# Supplementary material for: Laboratory-scale in situ X-ray absorption spectroscopy of a palladium catalyst on a compact inverse-Compton scattering X-ray beamline
Source: Royal Society of Chemistry journal article supplement (doi:10.1039/d1ja00274k), 2021-01-01
Supplement: d1ja00274k2.pdf [file d1ja00274k2.pdf]

## Supplementary Information for

# Laboratory-Scale In-Situ X-Ray Absorption Spectroscopy of a Palladium Catalyst on a Compact Inverse-Compton Scattering X-Ray Beamline

Geometry & parameters in ray tracing simulation using XRT<sup>1-2</sup> package.

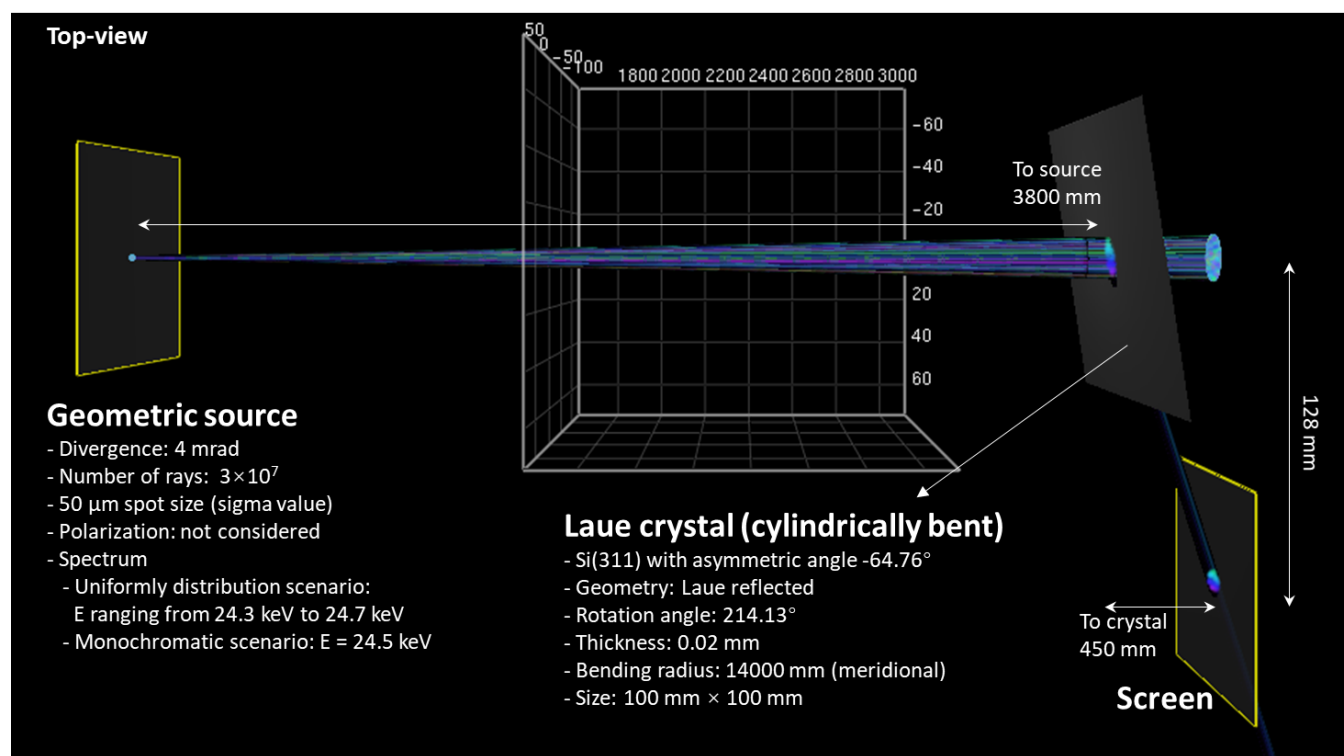

## Reference

1. Konstantin Klementiev and Roman Chernikov "Powerful scriptable ray tracing package xrt", *Proc. SPIE 9209*, Advances in Computational Methods for X-Ray Optics III, 92090A (2014)
2. <https://xrt.readthedocs.io/index.html#>
